# Supplementary material for: Building citizen science intelligence for outbreak preparedness and response: a mixed-method study in nine countries to assess knowledge, readiness and feasibility
Source: HighWire-hosted journal article supplement (doi:10.1136/bmjgh-2023-014490), 2024-03-01
Supplement: bmjgh-2023-014490supp001_data_supplement.pdf [file bmjgh-2023-014490supp001_data_supplement.pdf]

## Supplementary materials

### Table of Contents

|                                                                                                      |    |
|------------------------------------------------------------------------------------------------------|----|
| <i>Survey questions</i> .....                                                                        | 2  |
| <i>Precaution adoption process model and the theory of planned behavior</i> .....                    | 7  |
| <i>Citizen science infographics and video</i> .....                                                  | 8  |
| <i>Focus group discussion guide</i> .....                                                            | 9  |
| <i>Distribution of variables across the stages of readiness</i> .....                                | 10 |
| <i>Determinants of participation in outbreak-related citizen science in all nine countries</i> ..... | 13 |

## Survey questions

### Demographics

1. How old are you? \_\_\_\_\_ years old
2. What is your gender?
  - a. Male
  - b. Female
  - c. Non-binary
  - d. Prefer not to say
3. What is your nationality? \_\_\_\_\_
4. What is your highest level of education attained?
  - a. No formal education
  - b. Primary school certificate
  - c. Secondary school certificate
  - d. Diploma
  - e. Degree
5. What is your marital status?
  - a. Never married
  - b. Married and/or living with a partner
  - c. Separated
  - d. Divorced
  - e. Widowed
6. What is your occupation?
  - a. Employed (please specify): \_\_\_\_\_
  - b. Unemployed
  - c. Student
  - d. Retiree
  - e. Homemaker
7. Which of these best describes the main area where you live?
  - a. Urban
  - b. Peri-urban
  - c. Rural
  - d. Slums/Informal settlers families
8. Do you have access to a mobile phone?
  - a. No
  - b. Yes, it is a feature phone
  - c. Yes, it is a smartphone
9. Do you have access to internet connection?
  - a. No
  - b. Yes

### Awareness

10. Have you heard of the term 'citizen science' before this survey?
  - a. No
  - b. Yes, please give example(s): \_\_\_\_\_
11. Can you name 3 words/phrases that come to mind when you hear the term 'citizen science'?  
\_\_\_\_\_
12. Have you heard of communities/people joining and contributing to science/research projects where they can help to design the project, collect, or analyze data?
  - a. No
  - b. Yes, please give example(s): \_\_\_\_\_

**[SHOW CITIZEN SCIENCE ANIMATION VIDEO or INFOGRAPHIC]**

13. Have you ever participated in the following activities related to the topic of pandemic/outbreak? **Please tick all that apply.**
  - a. Filled up surveys or participated in interviews/discussions
  - b. Helped in the design of a research project
  - c. Involved in the rollout of a research project

- d. Make decisions together with researchers while planning for a research project (such as purpose, type of activities, analysis of findings)
  - e. Lead/co-lead a community-based research project
  - f. Co-create new interventions/policies based on findings from a research project
  - g. Others (please specify): \_\_\_\_\_
  - h. None of the above
14. Do you know of any citizen science activities related to managing pandemics/outbreaks (e.g. COVID-19) in your country?
- a. No
  - b. Yes, please give example(s): \_\_\_\_\_
15. Do you know how you can join and contribute to citizen science projects in your country?
- a. No [skip to Qn17]
  - b. Yes
16. Through what channels do you obtain information about citizen science projects? **Please tick all that apply.**
- a. Traditional media (newspaper, television, radio)
  - b. Social media
  - c. Websites
  - d. Science/research organizations
  - e. Community-based organizations
  - f. Government initiatives
  - g. Word of mouth (friends, family)
  - h. Others (please specify): \_\_\_\_\_

#### Reliability

17. I am interested in science or health-related topics
- o-----o-----o-----o-----o
- Strongly disagree    Disagree                      Undecided    Agree                      Strongly agree
18. I am interested to participate in citizen science activities
- o-----o-----o-----o-----o
- Strongly disagree    Disagree                      Undecided    Agree                      Strongly agree
19. I can understand what citizen science means and how it relates to me
- o-----o-----o-----o-----o
- Strongly disagree    Disagree                      Undecided    Agree                      Strongly agree
20. It is important/useful to involve the public in research/science activities
- o-----o-----o-----o-----o
- Strongly disagree    Disagree                      Undecided    Agree                      Strongly agree
21. Have you ever thought of participating in pandemic/outbreak-related citizen science activities?
- a. No
  - b. Yes
22. If given the chance, what topics will you be interested to participate in for a citizen science project? **Please tick all that apply.** [all answers except option A, skip to Qn24]
- a. Managing pandemic/outbreak (e.g. COVID-19 preparedness and response)
  - b. Environmental issues/pollution
  - c. Nature and wildlife
  - d. Health and well-being
  - e. Digital technologies
  - f. Social and cultural issues
  - g. Others (please specify): \_\_\_\_\_
  - h. I am not interested in citizen science
23. What activities will you be interested to participate in for pandemic/outbreak-related citizen science projects? **Please tick all that apply.**
- a. Help to identify different data sources or gather community/local data to respond better to pandemics/outbreaks
  - b. Provide information to help researchers develop or improve predictive models to better predict, prepare, and respond to pandemics/outbreaks

- c. Co-design communication strategies for the local community so that pandemic/outbreak-related information is understandable and actionable by the public
- d. Understand human behaviour and practices when responding to pandemics/outbreaks and its associated measures/interventions
- e. Sitting at the same table as other stakeholders such as researchers and policymakers to discuss and make decisions on pandemic/outbreak-related matters
- f. Others (please specify): \_\_\_\_\_

#### Acceptability (determinants)

For the following 6 questions, you will be asked to select factors in different categories which will influence your decision to participate in pandemic/outbreak-related citizen science activities. After which, you will be asked to rank these 6 different categories of factors.

24. Which of the following **outcome/benefit expectation factors** will influence your decision to participate in pandemic/outbreak-related citizen science activities? **Please choose all that apply.**
  - a. The value/importance of my participation in influencing real-world outcomes
  - b. Able to learn new knowledge/skills
  - c. Monetary incentives
  - d. Urgency/seriousness of the problem to be addressed by the citizen science project (e.g. impact of pandemic/outbreak on my life)
  - e. An understanding of how the citizens science project will help me and my community
25. Among the factors you have chosen, please choose the factor most important to you: \_\_\_\_\_
26. Which of the following **cultural factors** will influence your decision to participate in pandemic/outbreak-related citizen science activities? **Please choose all that apply.**
  - a. The language used is easy for me to understand
  - b. Religious/spiritual belief
  - c. Family upbringing
  - d. Origin/Immigration status/Acculturation
27. Among the factors you have chosen, please choose the factor most important to you: \_\_\_\_\_
28. Which of the following **social factors** will influence your decision to participate in pandemic/outbreak-related citizen science activities? **Please choose all that apply.**
  - a. Being part of a community/social network
  - b. My friends/family are also participating
  - c. It is popular/trendy
  - d. My loved ones are supportive
  - e. Stigma faced if I participate
  - f. Having a well-known/celebrity spokesperson promoting the activities
29. Among the factors you have chosen, please choose the factor most important to you: \_\_\_\_\_
30. Which of the following **attitude/emotional factors** will influence your decision to participate in pandemic/outbreak-related citizen science activities? **Please choose all that apply.**
  - a. Feeling empowered/in control to resolve an issue that is important to me
  - b. I enjoy the activities
  - c. It gives me a sense of achievement
  - d. My interest level in the topic/activities
31. Among the factors you have chosen, please choose the factor most important to you: \_\_\_\_\_
32. Which of the following **project-specific details** will influence your decision to participate in pandemic/outbreak-related citizen science activities? **Please choose all that apply.**
  - a. Who is the organizer
  - b. Having a clear understanding of what tasks are expected of me
  - c. Able to relate to the purpose of the citizen science project
  - d. Transparency on how the data will be handled
  - e. Privacy and confidentiality measures that are in place
  - f. Ease of finding information about the project/widespread awareness campaigns/advertisements
  - g. Amount of control I have over the project (active vs passive role)
33. Among the factors you have chosen, please choose the factor most important to you: \_\_\_\_\_
34. Which of the following **practical considerations** will influence your decision to participate in pandemic/outbreak-related citizen science activities? **Please choose all that apply.**
  - a. Time commitment (hours per week)
  - b. Commitment period (long-term or short-term)
  - c. Competing priorities/stage of life I am in



- d. Knowledge/skills needed to carry out the activities
  - e. Cost of participation
  - f. Convenience/location
  - g. Medium of access (e.g. in-person, online, text message, call)
  - h. The level of risks/danger involved
35. Among the factors you have chosen, please choose the factor most important to you: \_\_\_\_\_
36. Based on the above examples, rank the following categories of factors from the **most important (1) to least important (6)** when deciding whether to participate in pandemic/outbreak-related citizen science activities.
- a. Outcome/benefit expectation factors
  - b. Cultural factors
  - c. Social factors
  - d. Attitude/emotional factors
  - e. Project-specific details
  - f. Practical considerations
37. Are there other factors that have not been mentioned that will discourage you from participating in citizen science activities?
- a. No
  - b. Yes (please specify): \_\_\_\_\_
38. Do you know of anyone (e.g. friends, family, colleagues) who participates/has participated in pandemic/outbreak-related citizen science activities?
- a. No
  - b. Yes
39. If given the chance to participate in pandemic/outbreak-related citizen science activities, do you expect to gain/learn anything out of your participation?
- a. No [skip to Qn41]
  - b. Yes
40. What do you hope to gain/learn? **Please tick all that apply.**
- a. Basic understanding of science/research
  - b. Skills needed to carry out science/research activities
  - c. Use of digital technologies
  - d. Collective problem solving skills
  - e. Critical thinking skills
  - f. Forming a community/network of like minded people
  - g. Others (please specify): \_\_\_\_\_

### Feasibility

41. Do you think participation in pandemic/outbreak-related citizen science activities will require specific knowledge or skill set?
- a. No
  - b. Yes
42. Do you think you have the skills to participate in pandemic/outbreak-related citizen science activities?
- a. No, and I am not confident that I can learn
  - b. No, but I am interested to learn
  - c. Somewhat, but will need more training
  - d. Yes, I am confident I have the skills
43. What do you think are the 3 most important attributes/characteristics that a person must have to participate in pandemic/outbreak-related citizen science activities? **Please tick your top 3.**
- a. Communication
  - b. Confidence in self
  - c. Curiosity
  - d. Outgoing/love to share
  - e. Open to new ideas
  - f. Others (please specify): \_\_\_\_\_
44. Assuming that you have access to a mobile phone and stable internet connection, will you be interested to participate in citizen science activities through digital platforms instead of traditional paper form or in-person interactions?
- a. No
  - b. Yes

45. Do you think you have the skills/confidence needed to participate in digital citizen science activities, which involves the use of digital technologies such as mobile phones?
- No, and I am not confident that I can learn
  - No, but I am interested to learn
  - Somewhat, but will need more training
  - Yes, I am confident that I have the skills

**Sustainability**

46. What do you hope to achieve in the long-term through your participation in pandemic/outbreak-related citizen science activities? **Please tick all that apply.**
- Understand how science works
  - Collective goal setting and problem solving in the community
  - Being informed of the latest findings/knowledge
  - Empowered to make decisions with policymakers
  - Having my voice heard
  - Prevent the next pandemic/outbreak
  - Others (please specify): \_\_\_\_\_
47. What factors will encourage you to continue participation in the long run? **Please tick all that apply.**
- Helping relationships/bonding from the social networks formed
  - Able to see the impact of my contribution
  - Regular follow up/communication with the researchers or policymakers
  - Others (please specify): \_\_\_\_\_

### Precaution adoption process model and the theory of planned behavior

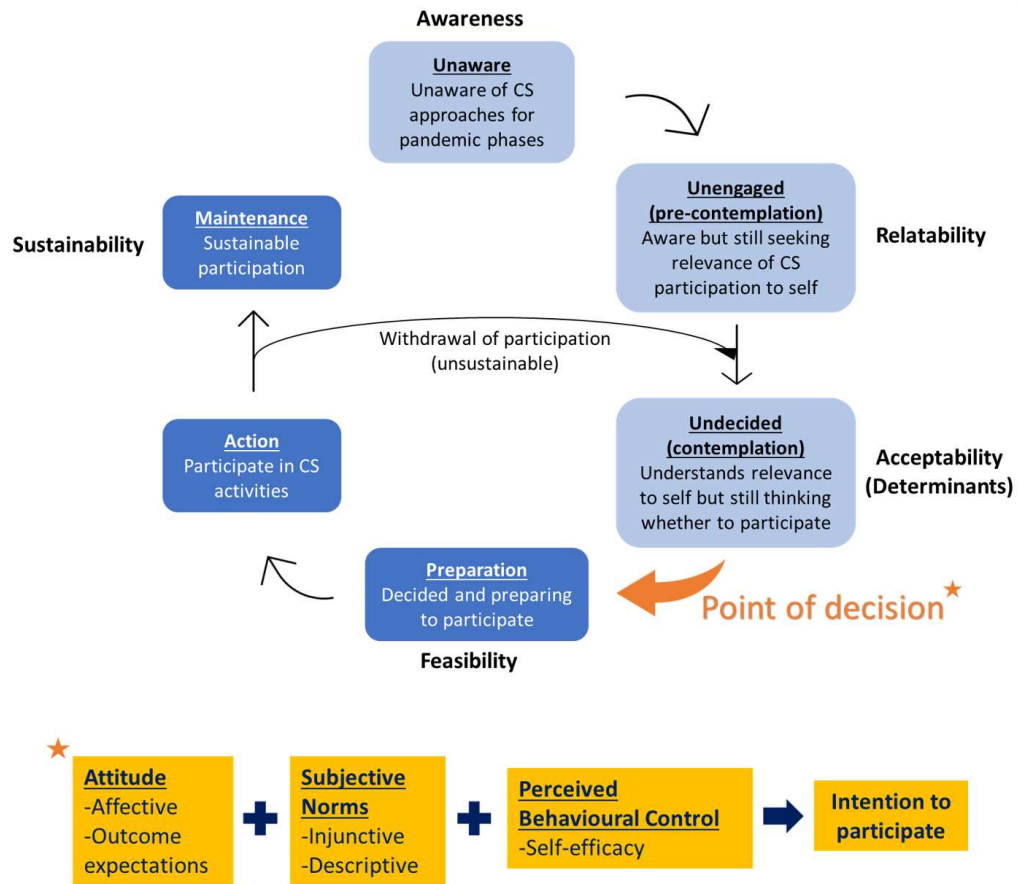

## Citizen science infographics and video

### (A) Infographics

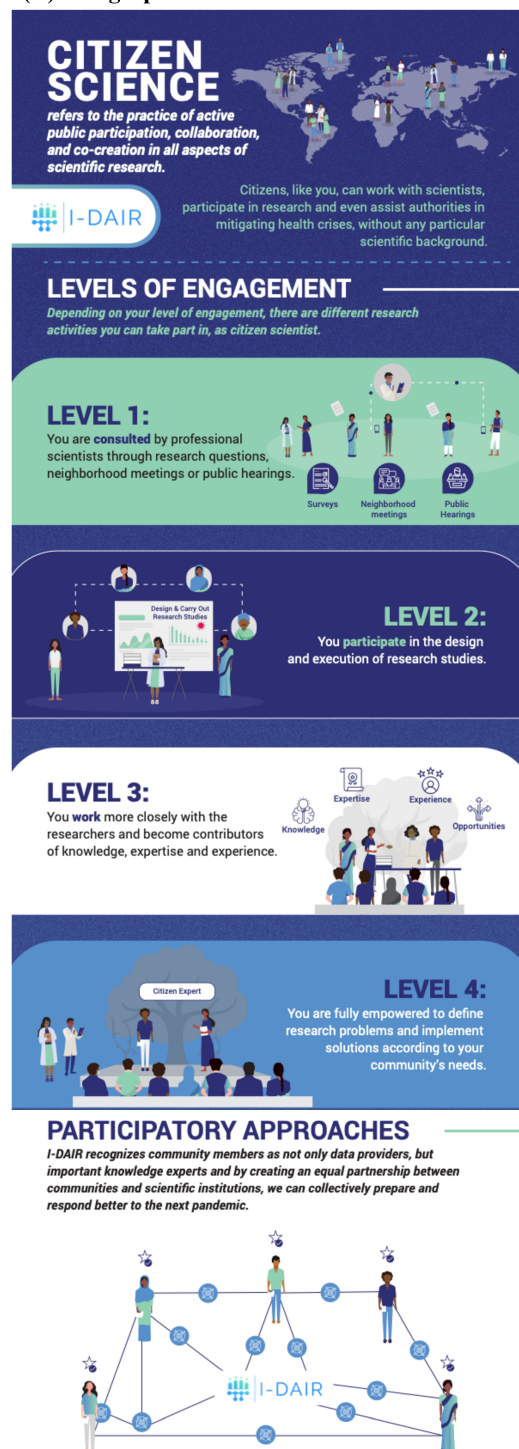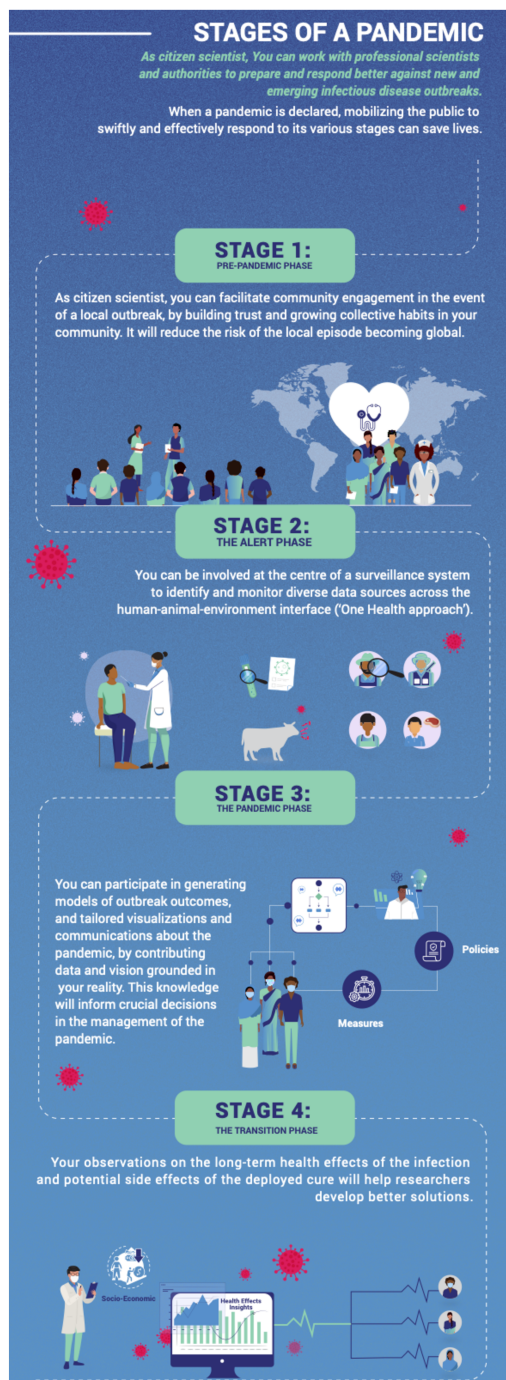

(B) Video link: <https://www.i-dair.org/pandemic-preparedness-and-response>

## Focus group discussion guide

1. Let us start the discussion by first talking about the concept of citizen science. From the survey, we found that you relate these words to the term citizen science. [*print out word cloud of CS phrases and show to participants*] Can you explain how you relate to these words and why you think they describe citizen science?
  - a. Imagine that now you have to explain citizen science to a fellow friend/peer, what would you say in your own words and how would you do it? [probe for slogan, medium to use]
2. In the survey, we also explored some of the citizen science activities related to managing pandemics in *your country* [*replace with country name*]. Some examples mentioned included [*insert activities based on survey findings*]. For these activities, can you share more about how you have been involved, elaborating on your role and the processes and tasks involved? [*for those who have not been involved, facilitator could ask them to imagine how they would like to be involved and what is the ideal state*]
  - a. What did you like about the experience?
  - b. What did you not like about the experience? How can it be improved?
  - c. Are there other activities which you can think of that have not been mentioned? Please elaborate.
3. According to the survey, most people agreed that it is important/useful to involve the community in science/research activities for managing pandemics/outbreaks.
  - a. What role(s) do you think citizens/the public should play?
  - b. What advantages can you think of when involving the community in science/research activities for managing pandemics/outbreaks?
  - c. What disadvantages can you think of when involving the community in science/research activities for managing pandemics/outbreaks?
4. What are the top 3 reasons that will motivate you to participate in pandemic/outbreak-related citizen science activities?
  - a. **Why** these reasons?
5. What are the top 3 reasons that will discourage/stop you from participating in pandemic/outbreak-related citizen science activities? [*possible probes: work/study pressure, family pressure, health issues, communication*]
  - a. **Why** these reasons?
6. Of the following categories of reasons that will determine your participation in pandemic/outbreak-related citizen science activities [*print out the table of categories and show to participants*], please rank them according to which you think is the most important reason to the least important reason. Please explain **why**.
7. One of the main objectives of citizen science is to hear the voices of the community and allow community members, researchers, and policymakers to define problems together and work on solutions together. What do you think of such an approach?
  - a. In terms of having your voices heard, how do you envision this being done? [*probe for the entire process from defining problem to co-designing the solution*]
    - i. What will be your main wishes and concerns?
  - b. Are there any other concerns when interacting with researchers and policymakers?
8. According to the survey, most people will be interested to participate in citizen science activities through digital platforms instead of traditional paper form or in-person interactions. Please tell us more about **why** this is so.
  - a. What are some of the advantages of each method of engagement?
  - b. What are some of the disadvantages of each method of engagement?
9. What types of pandemic/outbreak-related citizen science activities do you think can be done digitally/online?
10. According to the survey, most people expect to gain/learn something out of their participation in citizen science activities. Can you help us understand what do you hope to gain/learn?
  - a. **Why** is this important to you?
11. Do you think participating in citizen science activities is sustainable in the long run? Please **explain**.
  - a. If no, what will encourage you to continue your participation in such activities and why so?
  - b. If yes, why so?
12. What resources do you think are needed for you to participate in pandemic/outbreak-related citizen science activities in the long run?



**Distribution of variables across the stages of readiness**

| Country             | Variable            | Levels                             | N (%)      | Unaware n (%) | Aware but unengaged n (%) | Aware, engaged, but undecided n (%) | Aware, engaged, decided, but yet to take action n (%) | Aware, engaged, decided, took action n (%) |
|---------------------|---------------------|------------------------------------|------------|---------------|---------------------------|-------------------------------------|-------------------------------------------------------|--------------------------------------------|
| Bangladesh          | Gender              | Male                               | 155 (55.4) | 145 (93.5)    | 0                         | 1 (0.6)                             | 4 (2.6)                                               | 5 (3.2)                                    |
|                     |                     | Female                             | 125 (44.6) | 117 (93.6)    | 0                         | 3 (2.4)                             | 2 (1.6)                                               | 3 (2.4)                                    |
|                     | Education           | No formal education                | 29 (10.4)  | 29 (100.0)    | 0                         | 0                                   | 0                                                     | 0                                          |
|                     |                     | Primary school                     | 57 (20.4)  | 57 (100.0)    | 0                         | 0                                   | 0                                                     | 0                                          |
|                     |                     | Secondary school                   | 65 (23.2)  | 63 (96.9)     | 0                         | 0                                   | 1 (1.5)                                               | 1 (1.5)                                    |
|                     |                     | Diploma                            | 33 (11.8)  | 30 (90.9)     | 0                         | 2 (6.1)                             | 1 (3.0)                                               | 0                                          |
|                     |                     | Degree                             | 96 (34.3)  | 83 (86.5)     | 0                         | 2 (2.1)                             | 4 (4.2)                                               | 7 (7.3)                                    |
|                     | Marital status      | Never married                      | 63 (22.5)  | 60 (95.2)     | 0                         | 1 (1.6)                             | 2 (3.2)                                               | 0                                          |
|                     |                     | Married and/or living with partner | 213 (76.1) | 198 (93.0)    | 0                         | 3 (1.4)                             | 4 (1.9)                                               | 8 (3.8)                                    |
|                     |                     | Separated/Divorced/Widowed         | 4 (1.4)    | 4 (100.0)     | 0                         | 0                                   | 0                                                     | 0                                          |
|                     | Occupation          | Unemployed                         | 18 (6.4)   | 18 (100.0)    | 0                         | 0                                   | 0                                                     | 0                                          |
|                     |                     | Employed                           | 164 (58.6) | 148 (90.2)    | 0                         | 3 (1.8)                             | 5 (3.0)                                               | 8 (4.9)                                    |
|                     |                     | Student                            | 36 (12.9)  | 34 (94.4)     | 0                         | 1 (2.8)                             | 1 (2.8)                                               | 0                                          |
|                     |                     | Retiree                            | 1 (0.4)    | 1 (100.0)     | 0                         | 0                                   | 0                                                     | 0                                          |
|                     |                     | Homemaker                          | 61 (21.8)  | 61 (100.0)    | 0                         | 0                                   | 0                                                     | 0                                          |
|                     | Living area         | Urban                              | 46 (16.4)  | 42 (91.3)     | 0                         | 3 (6.5)                             | 1 (2.2)                                               | 0                                          |
|                     |                     | Peri-urban                         | 30 (10.7)  | 28 (93.3)     | 0                         | 0                                   | 1 (3.3)                                               | 1 (3.3)                                    |
|                     |                     | Rural                              | 204 (72.9) | 192 (94.1)    | 0                         | 1 (0.5)                             | 4 (2.0)                                               | 7 (3.4)                                    |
|                     | Mobile phone access | No                                 | 8 (2.9)    | 8 (100.0)     | 0                         | 0                                   | 0                                                     | 0                                          |
| Yes, feature phone  |                     | 97 (34.6)                          | 93 (95.9)  | 0             | 1 (1.0)                   | 1 (1.0)                             | 2 (2.1)                                               |                                            |
| Internet access     | Yes, smartphone     | 175 (62.5)                         | 161 (92.0) | 0             | 3 (1.7)                   | 5 (2.9)                             | 6 (3.4)                                               |                                            |
|                     | No                  | 102 (36.4)                         | 98 (96.1)  | 0             | 1 (1.0)                   | 1 (1.0)                             | 2 (2.0)                                               |                                            |
| India               | Gender              | Male                               | 140 (50.0) | 43 (30.7)     | 41 (29.3)                 | 38 (27.1)                           | 5 (3.6)                                               | 13 (9.3)                                   |
|                     |                     | Female                             | 140 (50.0) | 36 (25.7)     | 51 (36.4)                 | 25 (17.9)                           | 11 (7.9)                                              | 17 (12.1)                                  |
|                     | Education           | No formal education                | 18 (6.4)   | 12 (66.7)     | 6 (33.3)                  | 0                                   | 0                                                     | 0                                          |
|                     |                     | Primary school                     | 54 (19.3)  | 18 (33.3)     | 31 (57.4)                 | 5 (9.3)                             | 0                                                     | 0                                          |
|                     |                     | Secondary school                   | 126 (45.0) | 34 (27.0)     | 42 (33.3)                 | 31 (24.6)                           | 10 (7.9)                                              | 9 (7.1)                                    |
|                     |                     | Diploma                            | 24 (8.6)   | 5 (20.8)      | 7 (29.2)                  | 7 (29.2)                            | 0                                                     | 5 (20.8)                                   |
|                     |                     | Degree                             | 58 (20.7)  | 10 (17.2)     | 6 (10.3)                  | 20 (34.5)                           | 6 (10.3)                                              | 16 (27.6)                                  |
|                     | Marital status      | Never married                      | 92 (32.9)  | 15 (16.3)     | 28 (30.4)                 | 31 (33.7)                           | 12 (13.0)                                             | 6 (6.5)                                    |
|                     |                     | Married and/or living with partner | 176 (62.9) | 59 (33.5)     | 58 (33.0)                 | 32 (18.2)                           | 4 (2.3)                                               | 23 (13.1)                                  |
|                     |                     | Separated/Divorced/Widowed         | 12 (4.3)   | 5 (41.7)      | 6 (50.0)                  | 0                                   | 0                                                     | 1 (8.3)                                    |
|                     | Occupation          | Unemployed                         | 13 (4.6)   | 2 (15.4)      | 7 (53.8)                  | 2 (15.4)                            | 0                                                     | 2 (15.4)                                   |
|                     |                     | Employed                           | 136 (48.6) | 42 (30.9)     | 34 (25.0)                 | 31 (22.8)                           | 3 (2.2)                                               | 26 (19.1)                                  |
|                     |                     | Student                            | 60 (21.4)  | 5 (8.3)       | 20 (33.3)                 | 24 (40.0)                           | 11 (18.3)                                             | 0                                          |
|                     |                     | Retiree                            | 16 (5.7)   | 6 (37.5)      | 6 (37.5)                  | 2 (12.5)                            | 0                                                     | 2 (12.5)                                   |
|                     |                     | Homemaker                          | 55 (19.6)  | 24 (43.6)     | 25 (45.5)                 | 4 (7.3)                             | 2 (3.6)                                               | 0                                          |
|                     | Living area         | Urban                              | 4 (1.4)    | 2 (50.0)      | 0                         | 0                                   | 0                                                     | 2 (50.0)                                   |
|                     |                     | Peri-urban                         | 1 (0.4)    | 1 (100.0)     | 0                         | 0                                   | 0                                                     | 0                                          |
|                     |                     | Rural                              | 269 (96.1) | 70 (26.0)     | 92 (34.2)                 | 63 (23.4)                           | 16 (5.9)                                              | 28 (10.4)                                  |
|                     |                     | Slums/Informal settler families    | 6 (2.1)    | 6 (100.0)     | 0                         | 0                                   | 0                                                     | 0                                          |
| Mobile phone access | No                  | 37 (13.2)                          | 19 (51.4)  | 17 (45.9)     | 0                         | 0                                   | 1 (2.7)                                               |                                            |
|                     | Yes, feature phone  | 65 (23.2)                          | 24 (36.9)  | 30 (46.2)     | 7 (10.8)                  | 1 (1.5)                             | 3 (4.6)                                               |                                            |
|                     | Yes, smartphone     | 178 (63.6)                         | 36 (20.2)  | 45 (25.3)     | 56 (31.5)                 | 15 (8.4)                            | 26 (14.6)                                             |                                            |
| Internet access     | No                  | 99 (35.4)                          | 43 (43.4)  | 45 (45.5)     | 6 (6.1)                   | 1 (1.0)                             | 4 (4.0)                                               |                                            |
|                     | Yes                 | 181 (64.6)                         | 36 (19.9)  | 47 (26.0)     | 57 (31.5)                 | 15 (8.3)                            | 26 (14.4)                                             |                                            |
| Indonesia           | Gender              | Male                               | 172 (46.7) | 121 (70.3)    | 6 (3.5)                   | 18 (10.5)                           | 2 (1.2)                                               | 25 (14.5)                                  |
|                     |                     | Female                             | 196 (53.3) | 149 (76.0)    | 5 (2.6)                   | 7 (3.6)                             | 3 (1.5)                                               | 32 (16.3)                                  |
|                     | Education           | No formal education                | 2 (0.5)    | 2 (100.0)     | 0                         | 0                                   | 0                                                     | 0                                          |
|                     |                     | Primary school                     | 23 (6.2)   | 21 (91.3)     | 0                         | 2 (8.7)                             | 0                                                     | 0                                          |
|                     |                     | Secondary school                   | 177 (48.1) | 138 (78.0)    | 6 (3.4)                   | 13 (7.3)                            | 2 (1.1)                                               | 18 (10.2)                                  |
|                     |                     | Diploma                            | 38 (10.3)  | 25 (65.8)     | 2 (5.3)                   | 3 (7.9)                             | 1 (2.6)                                               | 7 (18.4)                                   |
|                     |                     | Degree                             | 128 (34.8) | 84 (65.6)     | 3 (2.3)                   | 7 (5.5)                             | 2 (1.6)                                               | 32 (25.0)                                  |
|                     | Marital status      | Never married                      | 210 (57.1) | 159 (75.7)    | 7 (3.3)                   | 12 (5.7)                            | 5 (2.4)                                               | 27 (12.9)                                  |
|                     |                     | Married and/or living with partner | 129 (35.1) | 85 (65.9)     | 4 (3.1)                   | 11 (8.5)                            | 0                                                     | 29 (22.5)                                  |
|                     |                     | Separated/Divorced/Widowed         | 29 (7.9)   | 26 (89.7)     | 0                         | 2 (6.9)                             | 0                                                     | 1 (3.4)                                    |
|                     | Occupation          | Unemployed                         | 54 (14.7)  | 46 (85.2)     | 4 (7.4)                   | 2 (3.7)                             | 0                                                     | 2 (3.7)                                    |
|                     |                     | Employed                           | 192 (52.2) | 125 (65.1)    | 4 (2.1)                   | 17 (8.9)                            | 3 (1.6)                                               | 43 (22.4)                                  |
|                     |                     | Student                            | 94 (25.5)  | 74 (78.7)     | 3 (3.2)                   | 4 (4.3)                             | 2 (2.1)                                               | 11 (11.7)                                  |
|                     |                     | Retiree                            | 4 (1.1)    | 4 (100.0)     | 0                         | 0                                   | 0                                                     | 0                                          |
|                     |                     | Homemaker                          | 24 (6.5)   | 21 (87.5)     | 0                         | 2 (8.3)                             | 0                                                     | 1 (4.2)                                    |
|                     | Living area         | Urban                              | 188 (51.1) | 139 (73.9)    | 2 (1.1)                   | 8 (4.3)                             | 2 (1.1)                                               | 37 (19.7)                                  |
|                     |                     | Peri-urban                         | 38 (10.3)  | 34 (89.5)     | 2 (5.3)                   | 1 (2.6)                             | 0                                                     | 1 (2.6)                                    |
|                     |                     | Rural                              | 125 (34.0) | 85 (68.0)     | 7 (5.6)                   | 16 (12.8)                           | 2 (1.6)                                               | 15 (12.0)                                  |
|                     |                     | Slums/Informal settler families    | 17 (4.6)   | 12 (70.6)     | 0                         | 0                                   | 1 (5.9)                                               | 4 (23.5)                                   |
| Mobile phone access | No                  | 17 (4.6)                           | 16 (94.1)  | 0             | 0                         | 0                                   | 1 (5.9)                                               |                                            |
|                     | Yes, feature phone  | 34 (9.2)                           | 31 (91.2)  | 1 (2.9)       | 1 (2.9)                   | 1 (2.9)                             | 0                                                     |                                            |
|                     | Yes, smartphone     | 317 (86.1)                         | 223 (70.3) | 10 (3.2)      | 24 (7.6)                  | 4 (1.3)                             | 56 (17.7)                                             |                                            |

|                     |                     |                                    |            |            |           |           |           |           |
|---------------------|---------------------|------------------------------------|------------|------------|-----------|-----------|-----------|-----------|
|                     | Internet access     | No                                 | 31 (8.4)   | 31 (100.0) | 0         | 0         | 0         | 0         |
|                     |                     | Yes                                | 337 (91.6) | 239 (70.9) | 11 (3.3)  | 25 (7.4)  | 5 (1.5)   | 57 (16.9) |
| Nepal               | Gender              | Male                               | 161 (57.5) | 39 (24.2)  | 9 (5.6)   | 24 (14.9) | 30 (18.6) | 59 (36.6) |
|                     |                     | Female                             | 119 (42.5) | 31 (26.1)  | 8 (6.7)   | 25 (21.0) | 24 (20.2) | 31 (26.1) |
|                     | Education           | No formal education                | 19 (6.8)   | 7 (36.8)   | 4 (21.1)  | 7 (36.8)  | 0         | 1 (5.3)   |
|                     |                     | Primary school                     | 34 (12.1)  | 14 (41.2)  | 5 (14.7)  | 8 (23.5)  | 3 (8.8)   | 4 (11.8)  |
|                     |                     | Secondary school                   | 101 (36.1) | 31 (30.7)  | 5 (5.0)   | 19 (18.8) | 22 (21.8) | 24 (23.8) |
|                     |                     | Diploma                            | 69 (24.6)  | 7 (10.1)   | 2 (2.9)   | 8 (11.6)  | 18 (26.1) | 34 (49.3) |
|                     |                     | Degree                             | 57 (20.4)  | 11 (19.3)  | 1 (1.8)   | 7 (12.3)  | 11 (19.3) | 27 (47.4) |
|                     | Marital status      | Never married                      | 99 (35.4)  | 19 (19.2)  | 2 (2.0)   | 14 (14.1) | 31 (31.3) | 33 (33.3) |
|                     |                     | Married and/or living with partner | 166 (59.3) | 50 (30.1)  | 12 (7.2)  | 32 (19.3) | 23 (13.9) | 49 (29.5) |
|                     |                     | Separated/Divorced/Widowed         | 15 (5.4)   | 1 (6.7)    | 3 (20.0)  | 3 (20.0)  | 0         | 8 (53.3)  |
|                     | Occupation          | Unemployed                         | 15 (5.4)   | 9 (60.0)   | 2 (13.3)  | 2 (13.3)  | 1 (6.7)   | 1 (6.7)   |
|                     |                     | Employed                           | 152 (54.3) | 28 (18.4)  | 5 (3.3)   | 23 (15.1) | 29 (19.1) | 67 (44.1) |
|                     |                     | Student                            | 64 (22.9)  | 12 (18.8)  | 3 (4.7)   | 12 (18.8) | 20 (31.2) | 17 (26.6) |
|                     |                     | Retiree                            | 21 (7.5)   | 10 (47.6)  | 2 (9.5)   | 2 (9.5)   | 2 (9.5)   | 5 (23.8)  |
|                     |                     | Homemaker                          | 28 (10.0)  | 11 (39.3)  | 5 (17.9)  | 10 (35.7) | 2 (7.1)   | 0         |
|                     | Living area         | Urban                              | 213 (76.1) | 50 (23.5)  | 10 (4.7)  | 35 (16.4) | 43 (20.2) | 75 (35.2) |
|                     |                     | Peri-urban                         | 48 (17.1)  | 11 (22.9)  | 6 (12.5)  | 10 (20.8) | 11 (22.9) | 10 (20.8) |
|                     |                     | Rural                              | 19 (6.8)   | 9 (47.4)   | 1 (5.3)   | 4 (21.1)  | 0         | 5 (26.3)  |
|                     | Mobile phone access | No                                 | 8 (2.9)    | 1 (12.5)   | 5 (62.5)  | 2 (25.0)  | 0         | 0         |
|                     |                     | Yes, feature phone                 | 4 (1.4)    | 2 (50.0)   | 0         | 1 (25.0)  | 0         | 1 (25.0)  |
| Yes, smartphone     |                     | 268 (95.7)                         | 67 (25.0)  | 12 (4.5)   | 46 (17.2) | 54 (20.1) | 89 (33.2) |           |
| Internet access     | No                  | 12 (4.3)                           | 3 (25.0)   | 5 (41.7)   | 3 (25.0)  | 0         | 1 (8.3)   |           |
|                     | Yes                 | 268 (95.7)                         | 67 (25.0)  | 12 (4.5)   | 46 (17.2) | 54 (20.1) | 89 (33.2) |           |
| Philippines         | Gender              | Male                               | 218 (47.5) | 188 (86.2) | 6 (2.8)   | 8 (3.7)   | 2 (0.9)   | 14 (6.4)  |
|                     |                     | Female                             | 241 (52.5) | 202 (83.8) | 7 (2.9)   | 3 (1.2)   | 7 (2.9)   | 22 (9.1)  |
|                     | Education           | No formal education                | 19 (4.1)   | 17 (89.5)  | 2 (10.5)  | 0         | 0         | 0         |
|                     |                     | Primary school                     | 44 (9.6)   | 39 (88.6)  | 2 (4.5)   | 1 (2.3)   | 0         | 2 (4.5)   |
|                     |                     | Secondary school                   | 206 (44.9) | 171 (83.0) | 4 (1.9)   | 8 (3.9)   | 6 (2.9)   | 17 (8.3)  |
|                     |                     | Diploma                            | 79 (17.2)  | 67 (84.8)  | 3 (3.8)   | 0         | 1 (1.3)   | 8 (10.1)  |
|                     |                     | Degree                             | 111 (24.2) | 96 (86.5)  | 2 (1.8)   | 2 (1.8)   | 2 (1.8)   | 9 (8.1)   |
|                     | Marital status      | Never married                      | 283 (61.7) | 243 (85.9) | 8 (2.8)   | 9 (3.2)   | 3 (1.1)   | 20 (7.1)  |
|                     |                     | Married and/or living with partner | 137 (29.8) | 115 (83.9) | 2 (1.5)   | 1 (0.7)   | 6 (4.4)   | 13 (9.5)  |
|                     |                     | Separated/Divorced/Widowed         | 39 (8.5)   | 32 (82.1)  | 3 (7.7)   | 1 (2.6)   | 0         | 3 (7.7)   |
|                     | Occupation          | Unemployed                         | 90 (19.6)  | 79 (87.8)  | 6 (6.7)   | 0         | 1 (1.1)   | 4 (4.4)   |
|                     |                     | Employed                           | 117 (25.5) | 101 (86.3) | 1 (0.9)   | 1 (0.9)   | 4 (3.4)   | 10 (8.5)  |
|                     |                     | Student                            | 203 (44.2) | 169 (83.3) | 5 (2.5)   | 9 (4.4)   | 4 (2.0)   | 16 (7.9)  |
|                     |                     | Retiree                            | 14 (3.1)   | 12 (85.7)  | 0         | 1 (7.1)   | 0         | 1 (7.1)   |
|                     |                     | Homemaker                          | 35 (7.6)   | 29 (82.9)  | 1 (2.9)   | 0         | 0         | 5 (14.3)  |
|                     | Living area         | Urban                              | 194 (42.3) | 156 (80.4) | 6 (3.1)   | 7 (3.6)   | 3 (1.5)   | 22 (11.3) |
|                     |                     | Peri-urban                         | 21 (4.6)   | 20 (95.2)  | 1 (4.8)   | 0         | 0         | 0         |
|                     |                     | Rural                              | 229 (49.9) | 202 (88.2) | 5 (2.2)   | 4 (1.7)   | 4 (1.7)   | 14 (6.1)  |
|                     |                     | Slums/Informal settler families    | 15 (3.3)   | 12 (80.0)  | 1 (6.7)   | 0         | 2 (13.3)  | 0         |
|                     | Mobile phone access | No                                 | 53 (11.5)  | 47 (88.7)  | 3 (5.7)   | 0         | 0         | 3 (5.7)   |
| Yes, feature phone  |                     | 43 (9.4)                           | 34 (79.1)  | 2 (4.7)    | 0         | 3 (7.0)   | 4 (9.3)   |           |
| Yes, smartphone     |                     | 363 (79.1)                         | 309 (85.1) | 8 (2.2)    | 11 (3.0)  | 6 (1.7)   | 29 (8.0)  |           |
| Internet access     | No                  | 92 (20.0)                          | 85 (92.4)  | 2 (2.2)    | 0         | 1 (1.1)   | 4 (4.3)   |           |
|                     | Yes                 | 367 (80.0)                         | 305 (83.1) | 11 (3.0)   | 11 (3.0)  | 8 (2.2)   | 32 (8.7)  |           |
| Cameroon            | Gender              | Male                               | 130 (45.0) | 108 (83.1) | 4 (3.1)   | 7 (5.4)   | 2 (1.5)   | 9 (6.9)   |
|                     |                     | Female                             | 159 (55.0) | 138 (86.8) | 7 (4.4)   | 1 (0.6)   | 2 (1.3)   | 11 (6.9)  |
|                     | Education           | No formal education                | 24 (8.3)   | 24 (100.0) | 0         | 0         | 0         | 0         |
|                     |                     | Primary school                     | 61 (21.1)  | 59 (96.7)  | 0         | 1 (1.6)   | 1 (1.6)   | 0         |
|                     |                     | Secondary school                   | 83 (28.7)  | 70 (84.3)  | 3 (3.6)   | 2 (2.4)   | 2 (2.4)   | 6 (7.2)   |
|                     |                     | Diploma                            | 37 (12.8)  | 28 (75.7)  | 2 (5.4)   | 3 (8.1)   | 0         | 4 (10.8)  |
|                     |                     | Degree                             | 84 (29.1)  | 65 (77.4)  | 6 (7.1)   | 2 (2.4)   | 1 (1.2)   | 10 (11.9) |
|                     | Marital status      | Never married                      | 156 (54.0) | 131 (84.0) | 6 (3.8)   | 3 (1.9)   | 2 (1.3)   | 14 (9.0)  |
|                     |                     | Married and/or living with partner | 121 (41.9) | 103 (85.1) | 5 (4.1)   | 5 (4.1)   | 2 (1.7)   | 6 (5.0)   |
|                     |                     | Separated/Divorced/Widowed         | 12 (4.2)   | 12 (100.0) | 0         | 0         | 0         | 0         |
|                     | Occupation          | Unemployed                         | 49 (17.0)  | 41 (83.7)  | 2 (4.1)   | 1 (2.0)   | 0         | 5 (10.2)  |
|                     |                     | Employed                           | 162 (56.1) | 138 (85.2) | 4 (2.5)   | 6 (3.7)   | 3 (1.9)   | 11 (6.8)  |
|                     |                     | Student                            | 61 (21.1)  | 51 (83.6)  | 4 (6.6)   | 1 (1.6)   | 1 (1.6)   | 4 (6.6)   |
|                     |                     | Retiree                            | 1 (0.3)    | 1 (100.0)  | 0         | 0         | 0         | 0         |
|                     |                     | Homemaker                          | 16 (5.5)   | 15 (93.8)  | 1 (6.2)   | 0         | 0         | 0         |
|                     |                     |                                    |            |            |           |           |           |           |
|                     | Living area         | Urban                              | 164 (56.7) | 138 (84.1) | 7 (4.3)   | 4 (2.4)   | 2 (1.2)   | 13 (7.9)  |
|                     |                     | Peri-urban                         | 35 (12.1)  | 25 (71.4)  | 0         | 3 (8.6)   | 1 (2.9)   | 6 (17.1)  |
|                     |                     | Rural                              | 69 (23.9)  | 62 (89.9)  | 4 (5.8)   | 1 (1.4)   | 1 (1.4)   | 1 (1.4)   |
|                     |                     | Slums/Informal settler families    | 21 (7.3)   | 21 (100.0) | 0         | 0         | 0         | 0         |
| Mobile phone access | No                  | 30 (10.4)                          | 28 (93.3)  | 0          | 0         | 1 (3.3)   | 1 (3.3)   |           |
|                     | Yes, feature phone  | 58 (20.1)                          | 54 (93.1)  | 3 (5.2)    | 1 (1.7)   | 0         | 0         |           |
|                     | Yes, smartphone     | 201 (69.6)                         | 164 (81.6) | 8 (4.0)    | 7 (3.5)   | 3 (1.5)   | 19 (9.5)  |           |
| Internet access     | No                  | 75 (26.0)                          | 70 (93.3)  | 2 (2.7)    | 1 (1.3)   | 1 (1.3)   | 1 (1.3)   |           |
|                     | Yes                 | 214 (74.0)                         | 176 (82.2) | 9 (4.2)    | 7 (3.3)   | 3 (1.4)   | 19 (8.9)  |           |
| Kenya               | Gender              | Male                               | 66 (26.3)  | 46 (69.7)  | 0         | 5 (7.6)   | 1 (1.5)   | 14 (21.2) |
|                     |                     | Female                             | 185 (73.7) | 124 (67.0) | 6 (3.2)   | 9 (4.9)   | 3 (1.6)   | 43 (23.2) |
|                     | Education           | No formal education                | 3 (1.2)    | 1 (33.3)   | 0         | 0         | 0         | 2 (66.7)  |
| Primary school      |                     | 42 (16.7)                          | 31 (73.8)  | 1 (2.4)    | 4 (9.5)   | 0         | 6 (14.3)  |           |

|                     |                     |                                    |            |            |            |           |            |            |
|---------------------|---------------------|------------------------------------|------------|------------|------------|-----------|------------|------------|
|                     | Secondary school    | 103 (41.0)                         | 65 (63.1)  | 2 (1.9)    | 5 (4.9)    | 1 (1.0)   | 30 (29.1)  |            |
|                     |                     | Diploma                            | 70 (27.9)  | 52 (74.3)  | 3 (4.3)    | 5 (7.1)   | 2 (2.9)    | 8 (11.4)   |
|                     |                     | Degree                             | 33 (13.1)  | 21 (63.6)  | 0          | 0         | 1 (3.0)    | 11 (33.3)  |
|                     | Marital status      | Never married                      | 126 (50.2) | 93 (73.8)  | 3 (2.4)    | 5 (4.0)   | 4 (3.2)    | 21 (16.7)  |
|                     |                     | Married and/or living with partner | 85 (33.9)  | 54 (63.5)  | 1 (1.2)    | 7 (8.2)   | 0          | 23 (27.1)  |
|                     |                     | Separated/Divorced/Widowed         | 40 (15.9)  | 23 (57.5)  | 2 (5.0)    | 2 (5.0)   | 0          | 13 (32.5)  |
|                     | Occupation          | Unemployed                         | 131 (52.2) | 83 (63.4)  | 4 (3.1)    | 12 (9.2)  | 1 (0.8)    | 31 (23.7)  |
|                     |                     | Employed                           | 27 (10.8)  | 18 (66.7)  | 0          | 2 (7.4)   | 0          | 7 (25.9)   |
|                     |                     | Student                            | 77 (30.7)  | 60 (77.9)  | 2 (2.6)    | 0         | 3 (3.9)    | 12 (15.6)  |
|                     |                     | Retiree                            | 2 (0.8)    | 1 (50.0)   | 0          | 0         | 0          | 1 (50.0)   |
|                     |                     | Homemaker                          | 14 (5.6)   | 8 (57.1)   | 0          | 0         | 0          | 6 (42.9)   |
|                     | Living area         | Urban                              | 68 (27.1)  | 51 (75.0)  | 0          | 4 (5.9)   | 3 (4.4)    | 10 (14.7)  |
|                     |                     | Peri-urban                         | 26 (10.4)  | 16 (61.5)  | 2 (7.7)    | 1 (3.8)   | 0          | 7 (26.9)   |
|                     |                     | Rural                              | 45 (17.9)  | 35 (77.8)  | 0          | 3 (6.7)   | 0          | 7 (15.6)   |
|                     |                     | Slums/Informal settler families    | 112 (44.6) | 68 (60.7)  | 4 (3.6)    | 6 (5.4)   | 1 (0.9)    | 33 (29.5)  |
|                     | Mobile phone access | No                                 | 22 (8.8)   | 17 (77.3)  | 0          | 2 (9.1)   | 0          | 3 (13.6)   |
|                     |                     | Yes, feature phone                 | 45 (17.9)  | 29 (64.4)  | 2 (4.4)    | 2 (4.4)   | 0          | 12 (26.7)  |
|                     |                     | Yes, smartphone                    | 184 (73.3) | 124 (67.4) | 4 (2.2)    | 10 (5.4)  | 4 (2.2)    | 42 (22.8)  |
|                     | Internet access     | No                                 | 75 (29.9)  | 52 (69.3)  | 1 (1.3)    | 4 (5.3)   | 0          | 18 (24.0)  |
| Yes                 |                     | 176 (70.1)                         | 118 (67.0) | 5 (2.8)    | 10 (5.7)   | 4 (2.3)   | 39 (22.2)  |            |
| Uganda              | Gender              | Male                               | 190 (48.1) | 9 (4.7)    | 60 (31.6)  | 52 (27.4) | 34 (17.9)  | 35 (18.4)  |
|                     |                     | Female                             | 205 (51.9) | 10 (4.9)   | 74 (36.1)  | 48 (23.4) | 45 (22.0)  | 28 (13.7)  |
|                     | Education           | No formal education                | 58 (14.7)  | 6 (10.3)   | 33 (56.9)  | 16 (27.6) | 2 (3.4)    | 1 (1.7)    |
|                     |                     | Primary school                     | 150 (38.0) | 2 (1.3)    | 50 (33.3)  | 44 (29.3) | 29 (19.3)  | 25 (16.7)  |
|                     |                     | Secondary school                   | 163 (41.3) | 11 (6.7)   | 46 (28.2)  | 36 (22.1) | 41 (25.2)  | 29 (17.8)  |
|                     |                     | Diploma                            | 20 (5.1)   | 0          | 3 (15.0)   | 4 (20.0)  | 7 (35.0)   | 6 (30.0)   |
|                     |                     | Degree                             | 4 (1.0)    | 0          | 2 (50.0)   | 0         | 0          | 2 (50.0)   |
|                     | Marital status      | Never married                      | 96 (24.3)  | 8 (8.3)    | 31 (32.3)  | 24 (25.0) | 20 (20.8)  | 13 (13.5)  |
|                     |                     | Married and/or living with partner | 240 (60.8) | 9 (3.8)    | 74 (30.8)  | 61 (25.4) | 51 (21.2)  | 45 (18.8)  |
|                     |                     | Separated/Divorced/Widowed         | 59 (14.9)  | 2 (3.4)    | 29 (49.2)  | 15 (25.4) | 8 (13.6)   | 5 (8.5)    |
|                     | Occupation          | Unemployed                         | 101 (25.6) | 7 (6.9)    | 17 (16.8)  | 36 (35.6) | 22 (21.8)  | 19 (18.8)  |
|                     |                     | Employed                           | 195 (49.4) | 8 (4.1)    | 78 (40.0)  | 42 (21.5) | 37 (19.0)  | 30 (15.4)  |
|                     |                     | Student                            | 44 (11.1)  | 3 (6.8)    | 20 (45.5)  | 8 (18.2)  | 8 (18.2)   | 5 (11.4)   |
|                     |                     | Retiree                            | 4 (1.0)    | 1 (25.0)   | 2 (50.0)   | 0         | 0          | 1 (25.0)   |
|                     |                     | Homemaker                          | 51 (12.9)  | 0          | 17 (33.3)  | 14 (27.5) | 12 (23.5)  | 8 (15.7)   |
|                     | Living area         | Urban                              | 30 (7.6)   | 2 (6.7)    | 1 (3.3)    | 9 (30.0)  | 11 (36.7)  | 7 (23.3)   |
|                     |                     | Peri-urban                         | 152 (38.5) | 5 (3.3)    | 28 (18.4)  | 50 (32.9) | 37 (24.3)  | 32 (21.1)  |
|                     |                     | Rural                              | 211 (53.4) | 12 (5.7)   | 104 (49.3) | 41 (19.4) | 31 (14.7)  | 23 (10.9)  |
|                     |                     | Slums/Informal settler families    | 2 (0.5)    | 0          | 1 (50.0)   | 0         | 0          | 1 (50.0)   |
| Mobile phone access | No                  | 71 (18.0)                          | 7 (9.9)    | 51 (71.8)  | 10 (14.1)  | 2 (2.8)   | 1 (1.4)    |            |
|                     | Yes, feature phone  | 218 (55.2)                         | 12 (5.5)   | 64 (29.4)  | 67 (30.7)  | 45 (20.6) | 30 (13.8)  |            |
|                     | Yes, smartphone     | 106 (26.8)                         | 0          | 19 (17.9)  | 23 (21.7)  | 32 (30.2) | 32 (30.2)  |            |
| Internet access     | No                  | 291 (73.7)                         | 19 (6.5)   | 117 (40.2) | 77 (26.5)  | 48 (16.5) | 30 (10.3)  |            |
|                     | Yes                 | 104 (26.3)                         | 0          | 17 (16.3)  | 23 (22.1)  | 31 (29.8) | 33 (31.7)  |            |
| Zimbabwe            | Gender              | Male                               | 133 (45.5) | 44 (33.1)  | 3 (2.3)    | 1 (0.8)   | 0          | 85 (63.9)  |
|                     |                     | Female                             | 159 (54.5) | 46 (28.9)  | 4 (2.5)    | 10 (6.3)  | 2 (1.3)    | 97 (61.0)  |
|                     | Education           | No formal education                | 1 (0.3)    | 1 (100.0)  | 0          | 0         | 0          | 0          |
|                     |                     | Primary school                     | 11 (3.8)   | 1 (9.1)    | 1 (9.1)    | 0         | 0          | 9 (81.8)   |
|                     |                     | Secondary school                   | 158 (54.1) | 37 (23.4)  | 4 (2.5)    | 9 (5.7)   | 0          | 108 (68.4) |
|                     |                     | Diploma                            | 35 (12.0)  | 14 (40.0)  | 0          | 0         | 1 (2.9)    | 20 (57.1)  |
|                     |                     | Degree                             | 87 (29.8)  | 37 (42.5)  | 2 (2.3)    | 2 (2.3)   | 1 (1.1)    | 45 (51.7)  |
|                     | Marital status      | Never married                      | 96 (32.9)  | 38 (39.6)  | 3 (3.1)    | 4 (4.2)   | 1 (1.0)    | 50 (52.1)  |
|                     |                     | Married and/or living with partner | 128 (43.8) | 37 (28.9)  | 2 (1.6)    | 6 (4.7)   | 1 (0.8)    | 82 (64.1)  |
|                     |                     | Separated/Divorced/Widowed         | 68 (23.3)  | 15 (22.1)  | 2 (2.9)    | 1 (1.5)   | 0          | 50 (73.5)  |
|                     | Occupation          | Unemployed                         | 95 (32.5)  | 36 (37.9)  | 2 (2.1)    | 3 (3.2)   | 0          | 54 (56.8)  |
|                     |                     | Employed                           | 149 (51.0) | 38 (25.5)  | 3 (2.0)    | 4 (2.7)   | 2 (1.3)    | 102 (68.5) |
|                     |                     | Student                            | 42 (14.4)  | 14 (33.3)  | 2 (4.8)    | 3 (7.1)   | 0          | 23 (54.8)  |
|                     |                     | Retiree                            | 2 (0.7)    | 0          | 0          | 0         | 0          | 2 (100.0)  |
|                     |                     | Homemaker                          | 4 (1.4)    | 2 (50.0)   | 0          | 1 (25.0)  | 0          | 1 (25.0)   |
|                     | Living area         | Urban                              | 159 (54.5) | 61 (38.4)  | 4 (2.5)    | 3 (1.9)   | 0          | 91 (57.2)  |
|                     |                     | Peri-urban                         | 23 (7.9)   | 15 (65.2)  | 1 (4.3)    | 1 (4.3)   | 0          | 6 (26.1)   |
|                     |                     | Rural                              | 110 (37.7) | 14 (12.7)  | 2 (1.8)    | 7 (6.4)   | 2 (1.8)    | 85 (77.3)  |
|                     | Mobile phone access | No                                 | 11 (3.8)   | 5 (45.5)   | 1 (9.1)    | 0         | 0          | 5 (45.5)   |
| Yes, feature phone  |                     | 62 (21.2)                          | 5 (8.1)    | 0          | 1 (1.6)    | 0         | 56 (90.3)  |            |
| Yes, smartphone     |                     | 219 (75.0)                         | 80 (36.5)  | 6 (2.7)    | 10 (4.6)   | 2 (0.9)   | 121 (55.3) |            |
| Internet access     | No                  | 62 (21.2)                          | 13 (21.0)  | 2 (3.2)    | 0          | 0         | 47 (75.8)  |            |
|                     | Yes                 | 230 (78.8)                         | 77 (33.5)  | 5 (2.2)    | 11 (4.8)   | 2 (0.9)   | 135 (58.7) |            |



## Determinants of participation in outbreak-related citizen science in all nine countries

| Determinants                                                                                                                    | n (%)             |                   |                   |                   |                   |                   |                   |                   |                   |
|---------------------------------------------------------------------------------------------------------------------------------|-------------------|-------------------|-------------------|-------------------|-------------------|-------------------|-------------------|-------------------|-------------------|
|                                                                                                                                 | Asia              |                   |                   |                   |                   | Africa            |                   |                   |                   |
|                                                                                                                                 | Bangladesh        | India             | Indonesia         | Nepal             | Philippines       | Cameroon          | Kenya             | Uganda            | Zimbabwe          |
| <b>Incentivization factors</b>                                                                                                  |                   |                   |                   |                   |                   |                   |                   |                   |                   |
| Able to learn new knowledge/skills                                                                                              | <b>134 (47.9)</b> | <b>89 (31.8)</b>  | <b>128 (34.5)</b> | <b>105 (37.4)</b> | <b>198 (42.3)</b> | <b>76 (26.1)</b>  | <b>93 (37.1)</b>  | 94 (23.8)         | <b>141 (47.8)</b> |
| The value/importance of my participation in influencing real-world outcomes                                                     | 46 (16.4)         | 38 (13.6)         | 76 (20.5)         | 39 (13.9)         | 111 (23.7)        | 54 (18.6)         | 33 (13.1)         | 73 (18.5)         | 60 (20.3)         |
| An understanding of how the citizen science project will help me and my community                                               | 37 (13.2)         | 63 (22.5)         | 40 (10.8)         | 69 (24.6)         | 80 (17.1)         | 66 (22.7)         | 92 (36.7)         | 33 (8.4)          | 38 (12.9)         |
| Monetary incentives                                                                                                             | 37 (13.2)         | 85 (30.4)         | 35 (9.4)          | 13 (4.6)          | 27 (5.8)          | 40 (13.7)         | 6 (2.4)           | <b>180 (45.6)</b> | 31 (10.5)         |
| Urgency/seriousness of the problem to be addressed by the citizen science project (e.g. impact of pandemic/outbreak on my life) | 26 (9.3)          | 5 (1.8)           | 92 (24.8)         | 55 (19.6)         | 52 (11.1)         | 55 (18.9)         | 27 (10.8)         | 15 (3.8)          | 25 (8.5)          |
| <b>Cultural factors</b>                                                                                                         |                   |                   |                   |                   |                   |                   |                   |                   |                   |
| The language used is easy for me to understand                                                                                  | <b>149 (53.2)</b> | 19 (6.8)          | <b>283 (76.3)</b> | <b>84 (29.9)</b>  | <b>175 (37.4)</b> | <b>187 (64.3)</b> | <b>134 (53.4)</b> | <b>273 (69.1)</b> | <b>104 (35.3)</b> |
| Family upbringing                                                                                                               | 37 (13.2)         | <b>209 (74.6)</b> | 40 (10.8)         | 52 (18.5)         | 160 (34.2)        | 57 (19.6)         | 40 (15.9)         | 37 (9.4)          | 81 (27.5)         |
| Religious/spiritual belief                                                                                                      | 77 (27.5)         | 51 (18.2)         | 30 (8.1)          | 76 (27.0)         | 104 (22.2)        | 33 (11.3)         | 48 (19.1)         | 74 (18.7)         | 78 (26.4)         |
| Origin/Immigration status/Acculturation                                                                                         | 17 (6.1)          | 1 (0.4)           | 18 (4.9)          | 69 (24.6)         | 29 (6.2)          | 14 (4.8)          | 29 (11.6)         | 11 (2.8)          | 32 (10.8)         |
| <b>Social factors</b>                                                                                                           |                   |                   |                   |                   |                   |                   |                   |                   |                   |
| Being part of a community/social network                                                                                        | <b>159 (56.8)</b> | <b>146 (52.1)</b> | <b>180 (48.5)</b> | <b>140 (49.8)</b> | <b>258 (55.1)</b> | <b>134 (46.0)</b> | <b>189 (75.3)</b> | <b>203 (51.4)</b> | <b>138 (46.8)</b> |
| My friends/family are also participating                                                                                        | 75 (26.8)         | 77 (27.5)         | 88 (23.7)         | 69 (24.6)         | 121 (25.9)        | 63 (21.6)         | 21 (8.4)          | 75 (19.0)         | 47 (15.9)         |
| My loved ones are supportive                                                                                                    | 1 (0.4)           | 17 (6.1)          | 8 (2.2)           | 25 (8.9)          | 55 (11.8)         | 46 (15.8)         | 15 (6.0)          | 25 (6.3)          | 36 (12.2)         |
| It is popular/trendy                                                                                                            | 25 (8.9)          | 24 (8.6)          | 14 (3.8)          | 9 (3.2)           | 15 (3.2)          | 14 (4.8)          | 5 (2.0)           | 46 (11.6)         | 52 (17.6)         |
| Stigma faced if I participate                                                                                                   | 1 (0.4)           | 13 (4.6)          | 76 (20.5)         | 28 (10.0)         | 12 (2.6)          | 16 (5.5)          | 10 (4.0)          | 19 (4.8)          | 16 (5.4)          |
| Having a well-known/celebrity spokesperson promoting the activities                                                             | 19 (6.8)          | 3 (1.1)           | 5 (1.3)           | 10 (3.6)          | 7 (1.5)           | 18 (6.2)          | 11 (4.4)          | 27 (6.8)          | 6 (2.0)           |
| <b>Attitude and emotional factors</b>                                                                                           |                   |                   |                   |                   |                   |                   |                   |                   |                   |
| Feeling empowered to resolve an issue that is important to me                                                                   | 53 (18.9)         | 47 (16.8)         | <b>115 (31.0)</b> | <b>120 (42.7)</b> | <b>139 (29.7)</b> | <b>106 (36.4)</b> | <b>130 (51.8)</b> | <b>200 (50.6)</b> | <b>117 (39.7)</b> |
| I enjoy the activities                                                                                                          | <b>111 (39.6)</b> | <b>150 (53.6)</b> | 110 (29.6)        | 36 (12.8)         | 94 (20.1)         | 70 (24.1)         | 31 (12.4)         | 72 (18.2)         | 77 (26.1)         |
| It gives me a sense of achievement                                                                                              | 72 (25.7)         | 67 (23.9)         | 50 (13.5)         | 58 (20.6)         | 113 (24.1)        | 45 (15.5)         | 54 (21.5)         | 64 (16.2)         | 64 (21.7)         |
| My interest level in the topic/activities                                                                                       | 44 (15.7)         | 16 (5.7)          | 96 (25.9)         | 67 (23.8)         | 122 (26.1)        | 70 (24.1)         | 36 (14.3)         | 59 (14.9)         | 37 (12.5)         |
| <b>Project-specific factors</b>                                                                                                 |                   |                   |                   |                   |                   |                   |                   |                   |                   |
| Having a clear understanding of what tasks are expected of me                                                                   | <b>158 (56.4)</b> | 36 (12.9)         | <b>102 (27.5)</b> | 55 (19.6)         | <b>173 (37.0)</b> | <b>110 (37.8)</b> | <b>82 (32.7)</b>  | 79 (20.0)         | <b>107 (36.3)</b> |
| Able to relate to the purpose of the citizen science project                                                                    | 73 (26.1)         | 35 (12.5)         | 42 (11.3)         | <b>84 (29.9)</b>  | 80 (17.1)         | 42 (14.4)         | 76 (30.3)         | 60 (15.2)         | 86 (29.2)         |
| Who is the organizer                                                                                                            | 20 (7.1)          | <b>102 (36.4)</b> | 71 (19.1)         | 35 (12.5)         | 42 (9.0)          | 42 (14.4)         | 10 (4.0)          | <b>104 (26.3)</b> | 21 (7.1)          |
| Transparency on how the data will be handled                                                                                    | 12 (4.3)          | 28 (10.0)         | 40 (10.8)         | 16 (5.7)          | 60 (12.8)         | 36 (12.4)         | 23 (9.2)          | 68 (17.2)         | 37 (12.5)         |
| Privacy and confidentiality measures that are in place                                                                          | 3 (1.1)           | 65 (23.2)         | 52 (14.0)         | 25 (8.9)          | 53 (11.3)         | 32 (11.0)         | 20 (8.0)          | 37 (9.4)          | 22 (7.5)          |
| Ease of finding information about the project/widespread awareness campaigns/advertisements                                     | 10 (3.6)          | 11 (3.9)          | 44 (11.9)         | 42 (14.9)         | 45 (9.6)          | 15 (5.2)          | 33 (13.1)         | 28 (7.1)          | 15 (5.1)          |
| Amount of control I have over the project (active vs passive role)                                                              | 4 (1.4)           | 3 (1.1)           | 20 (5.4)          | 24 (8.5)          | 15 (3.2)          | 14 (4.8)          | 7 (2.8)           | 19 (4.8)          | 7 (2.4)           |
| <b>Practicality factors</b>                                                                                                     |                   |                   |                   |                   |                   |                   |                   |                   |                   |
| Knowledge/skills needed to carry out the activities                                                                             | <b>85 (30.4)</b>  | 17 (6.1)          | <b>75 (20.2)</b>  | <b>88 (31.3)</b>  | <b>164 (35.0)</b> | 57 (19.6)         | <b>125 (49.8)</b> | 61 (15.4)         | <b>70 (23.7)</b>  |
| Time commitment (hours per week)                                                                                                | 76 (27.1)         | 58 (20.7)         | 67 (18.1)         | 46 (16.4)         | 87 (18.6)         | <b>78 (26.8)</b>  | 37 (14.7)         | <b>102 (25.8)</b> | 57 (19.3)         |
| Cost of participation                                                                                                           | 30 (10.7)         | 47 (16.8)         | 62 (16.7)         | 20 (7.1)          | 35 (7.5)          | 38 (13.1)         | 13 (5.2)          | 81 (20.5)         | 29 (9.8)          |
| Commitment period (long-term or short-term)                                                                                     | 42 (15.0)         | 6 (2.1)           | 25 (6.7)          | 23 (8.2)          | 58 (12.4)         | 20 (6.9)          | 34 (13.5)         | 75 (19.0)         | 51 (17.3)         |
| Convenience/location                                                                                                            | 14 (5.0)          | 70 (25.0)         | 32 (8.6)          | 45 (16.0)         | 35 (7.5)          | 16 (5.5)          | 9 (3.6)           | 35 (8.9)          | 21 (7.1)          |
| The level of risks/danger involved                                                                                              | 4 (1.4)           | <b>80 (28.6)</b>  | 49 (13.2)         | 26 (9.3)          | 39 (8.3)          | 32 (11.0)         | 12 (4.8)          | 13 (3.3)          | 13 (4.4)          |
| Competing priorities/stage of life I am in                                                                                      | 25 (8.9)          | 2 (0.7)           | 40 (10.8)         | 4 (1.4)           | 31 (6.6)          | 16 (5.5)          | 8 (3.2)           | 14 (3.5)          | 44 (14.9)         |
| Medium of access (e.g. in-person, online, text message, call)                                                                   | 4 (1.4)           | 0                 | 21 (5.7)          | 29 (10.3)         | 19 (4.1)          | 34 (11.7)         | 13 (5.2)          | 14 (3.5)          | 10 (3.4)          |

Factor with the highest proportion of participants for each country under the six categories of determinants is highlighted in bold.
